# The Prevalence and Influence Factors of Inter-Ankle Systolic Blood Pressure Difference in Community Population

Zhihong Zhang<sup>1,2,3</sup>, Jianyong Ma<sup>1,3</sup>, Xuehua Tao<sup>3</sup>, Yueying Zhou<sup>4</sup>, Xin Liu<sup>2</sup>, Hai Su<sup>1\*</sup>

**1** Research Institute of Cardiovascular Diseases and Department of Cardiology, Second Affiliated Hospital of Nanchang University, Nanchang, Jiangxi, People's Republic of China, **2** Statistic Teaching Group, Fuzhou Medical College of Nanchang University, Fuzhou, Jiangxi, China, **3** Department of Medicine, Sixth Hospital of Nanchang City, Nanchang, Jiangxi, People's Republic of China, **4** Department of Medicine, Guizhou Hospital of Fushan City, Fushan, Guangdong, People's Republic of China

## Abstract

**Aim:** The aim of this study was to investigate the prevalence of interankle systolic blood pressure difference (sIAND) and its influencing factors in community population.

**Methods:** This study included 2849 (65.1±9.4 y) subjects. Blood pressure (BPs) of four limbs was simultaneously measured with 4 electronic sphygmomanometers after 10 min rest in supine position. The difference of systolic BP (SBP) between two ankles was calculated as DETASBP. The criterion for abnormal sIAND was ≥10 mmHg of absolute DeltaSBP, in which the criterion for 1o sIAND was 10–19 mmHg and for 2o sIAND was ≥20 mmHg. Age, gender, smoking, hypertension, family histories of hypertension and diabetes were recorded. Fasting blood glucose and lipids, circumference of hip and waist, and body mass index (BMI) were measured.

**Results:** The SBP was higher in the right ankle than in the left ankle (158.9±21.8 vs 157.3±21.6 mmHg, P<0.05) and mean DeltaSBP was 6.08±6.26 mmHg. Similar difference was found in both genders. The prevalence of abnormal was 18.5%, in which, the prevalence 1o sIAND was 15.3% and that of 2o sIAND was 3.1%. Multivariate regression analysis showed that age, waist circumference and blood glucose level were the positive factors for DeltaSBP. The normal upper limit for DeltaSBP was 16.7 mmHg in this population, the prevalence of sIAND by ≥16 mmHg was 5.8%.

**Conclusion:** Aging, hypertension, obesity and abnormal glucose metabolism are positive factors for inter-ankle SBP difference.

**Citation:** Zhang Z, Ma J, Tao X, Zhou Y, Liu X, et al. (2013) The Prevalence and Influence Factors of Inter-Ankle Systolic Blood Pressure Difference in Community Population. PLoS ONE 8(8): e70777. doi:10.1371/journal.pone.0070777

**Editor:** Emmanuel A. Burdmann, University of Sao Paulo Medical School, Brazil

**Received:** April 2, 2013; **Accepted:** June 21, 2013; **Published:** August 27, 2013

**Copyright:** © 2013 Zhang et al. This is an open-access article distributed under the terms of the Creative Commons Attribution License, which permits unrestricted use, distribution, and reproduction in any medium, provided the original author and source are credited.

**Funding:** This project was supported by a grant from the National High Technology Research and Development Program of China (863 Program, No. 2012AA02A516). The funders had no role in study design, data collection and analysis, decision to publish, or preparation of the manuscript.

**Competing Interests:** The authors have declared that no competing interests exist.

\* E-mail: suyihappy@sohu.com

These authors contributed equally to this work.

## Introduction

The guidelines for hypertension and blood pressure measurement point out that for the first blood pressure (BP) taking, two arms should be measured to evaluate interarm BP difference (IAD) [1]–[3].

Increasing data show that IAD is not only a sign for diagnosing subclavian and brachial artery stenosis, left ventricular hypertrophy, but also a predictor of adverse cardiovascular outcomes [4]–[6].

In recent years, some studies suggested that simultaneously measuring BP of four limbs can provide more valuable information, for example, an ankle-brachial index (ABI). A low ABI (<0.9) is an important sign for intermittent claudication and other peripheral vascular disease. Meanwhile, ABI is also a useful predictor for cardio-cerebrovascular diseases [7], [8]. Recently, as ankle BP can be easily measured, it is used more often in clinical practice. Some studies have demonstrated that ankle BP is a useful

BP index. A study showed that the leg BP in orthostatic posture is associated with left ventricular mass in normotensive subjects [9]. Furthermore, increased ankle BP is a marker of arterial stiffness or subclinical atherosclerosis, and an independent risk for future dementia, cardio-cerebrovascular morbidity and mortality [10],[11].

Like arms, two ankles in some patients may show significantly different BP, i.e., interankle BP difference (IAND). Recently, some studies showed that IAND could predict the risk for overall and cardio-cerebrovascular events [12],[13]. Because IAND was not widely studied, in the previous studies various diagnostic criteria were used: mean values, or quartile, or ≥10 mm Hg, or ≥15 mm Hg [12],[13].

One reason for this confusion phenomenon is no data about the prevalence of IAND in community population. This study was to investigate the prevalence of IAND in community population and to evaluate the possible influencing factors for IAND.

**Table 1.** Comparison of general information of two gender groups.

| Gender (n)   | Age (y)   | BMI (kg/m <sup>2</sup> ) | Smoking n (%) | History of HH n (%) | History of DM n (%) | History of CHD n (%) |
|--------------|-----------|--------------------------|---------------|---------------------|---------------------|----------------------|
| M(854)       | 66.6±9.1  | 23.4±3.2                 | 260(30.4)     | 300(35.1)           | 118(13.8)           | 26(3.0)              |
| F (1995)     | 64.5±9.5a | 23.5±3.5                 | 77(3.9)a      | 681(34.1)           | 234(11.7)           | 53(2.7)              |
| Total (2849) | 65.1±9.4  | 23.4±3.4                 | 337(11.8)     | 981(34.4)           | 352(12.4)           | 79(2.8)              |

HH: hypertension, DM: diabetes, CHD: coronary heart disease.

<sup>a</sup>compared with females,  $p < 0.05$ .

doi:10.1371/journal.pone.0070777.t001

## Methods

### Study Participants and data Collection

This study enrolled 3311 adult community residents of two different communities during Sept–Dec of 2011, one in Nanchang City of Jiangxi province and the other in Shunde City of Guangdong province. The information on age, sex, smoking (more than half year), family history of hypertension, histories of hypertension and diabetes were obtained with questionnaires and medical records. Waist and hip circumference, body mass index (BMI), fasting blood glucose, total cholesterol (TC), triglyceride (TG), high and low density lipoprotein cholesterol (HDL-C and LDL-C) were measured. Ratios of LDL-C/HDL-C and LDL-C/TC were calculated. The participants under antihypertensive therapy or with BP of 140/90 mmHg or more at investigation were diagnosed as hypertensive patients. Subjects with arrhythmias and known intermittent claudication were excluded. Finally, 2849 subjects of  $\geq 40$  years (854 males and 1995 females, 40–108 years old, mean age  $65.0 \pm 9.3$  y) with complete measurement data were included.

### BP measurements and parameters

This study focused on systolic IAND (sIAND). After 10-minute supine rest, supine BP of four limbs were measured simultaneously using 4 electronic sphygmomanometers (Omron HEM7101) for three times with a 2-minute interval. Their averages were used to calculate absolute interankle SBP difference (DETA BP). When DETASBP was 10–19 mm Hg class 1 sIAND (1o sIAND) and DETASBP was  $\geq 20$  mmHg class 2 sIAND (2o sIAND) were diagnosed [14],[15]. The higher SBP of two ankles was used as individual ankle SBP value to calculate ratio of DeltaSBP/SBP (%).

The higher SBP of two arms and the lower SBP of two ankles were used to calculate sABI, and sABI of  $< 0.9$  was considered as abnormal.

The proposal and the consent procedures of this study were approved by the Ethic Committees of the Second Affiliated

Hospital of Nanchang University, and of the Sixth Hospital of Nanchang city, and of Guizhou Hospital of Fushan city. All patients provided verbal informed consent for BP measurement of four limbs as this measurement is a non-invasive clinical examination.

### Statistical analysis

All data are presented as Mean  $\pm$  Standard Deviation (Mean  $\pm$  SD). The SPSS10.0 statistical package (SPSS Company, Chicago, Illinois, USA) was used for Student's t-test and Chi-square test in this study. Linear correlation analysis was used for the relationship between DeltaSBP or DeltaSBP/SBP and other variables.

In multivariate analysis, the independent variables were SBP and SBP/SBP, and the dependent variables were age, gender (male 1, female 0), BMI (kg/m<sup>2</sup>), waist circumference, hip circumference, smoking (yes 1, no 0), history of hypertension (yes 1, no 0), diabetes (yes 1, no 0), coronary heart disease (yes 1, no 0), TG, TC, LDL-C/HDL-C, LDL-C/TC and blood glucose levels. The definition of the normal upper limit of DETASBP was the reference value range of 95% on  $< \text{mean} + 1.64\text{SD}$ . Statistical significance was defined as  $P < 0.05$ .

## Results

### The general information between two gender groups

The general information is shown in Table 1. The mean age and smoking rate were higher in the male group than those in the female group (Table 1).

### Comparison of ankle SBP and sIAND prevalence between two gender groups

The right ankle SBP, either in males or in females, was about 1.7 mmHg higher than the left ankle SBP. Although the SBP was higher in males, DeltaSBP had no gender difference. In this population the normal upper limit for DeltaSBP was 16.7 mmHg.

**Table 2.** Comparison of ankle SBP and sIAND prevalence between two gender groups.

|              | Right ankle (mm Hg) | Left ankle (mm Hg) | $\Delta$ SBP (mm Hg) | $\Delta$ SBP/SBP (%) | No-sIAND (n,%) | Abnormal sIAND (n,%) | 1 <sup>o</sup> sIAND (n,%) | 2 <sup>o</sup> sIAND (n,%) |
|--------------|---------------------|--------------------|----------------------|----------------------|----------------|----------------------|----------------------------|----------------------------|
| M (854)      | 162.9±21.5          | 161.2±20.8b        | 6.48±7.10            | 4.06±4.45            | 673(78.8)      | 181(21.2)            | 153(17.9)                  | 28(3.3)                    |
| F (1995)     | 157.3±21.7a         | 155.6±21.7ab       | 5.92±5.86a           | 3.85±3.79            | 1650(82.7)a    | 345(17.3)a           | 284(14.2)a                 | 61(3.1)                    |
| Total (2849) | 158.9±21.8          | 157.3±21.6b        | 6.08±6.26            | 3.91±4.00            | 2323(81.5)     | 526(18.5)            | 437(15.3)                  | 89(3.1)                    |

<sup>a</sup>compared with males,  $p < 0.05$ ;

<sup>b</sup>compared with right ankle,  $p < 0.05$ .

doi:10.1371/journal.pone.0070777.t002

**Table 3.** The correlation coefficients of  $\Delta$ SBP and  $\Delta$ SBP/SBP with related factors.

| Parameters   | $\Delta$ SBP |          | $\Delta$ SBP/SBP |          |
|--------------|--------------|----------|------------------|----------|
|              | <i>r</i>     | <i>P</i> | <i>r</i>         | <i>P</i> |
| age          | 0.090        | <0.001   | 0.062            | 0.001    |
| BMI          | 0.081        | <0.001   | 0.052            | 0.006    |
| waist        | 0.105        | <0.001   | 0.072            | <0.001   |
| Hip          | 0.078        | <0.001   | 0.049            | 0.009    |
| TC           | 0.047        | 0.012    | 0.044            | 0.019    |
| glucose      | 0.092        | <0.001   | 0.059            | 0.010    |
| SBP          | 0.219        | <0.001   | 0.096            | <0.001   |
| DBP          | 0.156        | <0.001   | 0.087            | <0.001   |
| $\Delta$ DBP | 0.230        | <0.001   | 0.228            | <0.001   |

doi:10.1371/journal.pone.0070777.t003

Increased sIAND was found in 526 subjects (18.4%), of them, 437 subjects (15.3%) were diagnosed 1o sIAND and 89 subjects (3.1%) 2o sIAND. The prevalence of 10 sIAND was significantly higher in males than in females, but the prevalence of 20 sIAND was similar between two gender groups (Table 2).

Linear correlation analysis showed that DeltaSBP and DeltaSBP/SBP were positively correlated with age, BMI, waist circumference, hip circumference, blood glucose and TC levels. Meanwhile, DETASBP and DETASBP/SBP were positively correlated with baseline SBP also (Table 3).

### Multivariate regression analysis

Multivariate regression analysis showed that age, waist circumference, blood glucose levels and hypertension history were the positive factors for DeltaSBP. Meanwhile, age, waist circumference and blood glucose levels were the positive factors for DeltaSBP/SBP (Table 4).

### The relation between sIAND and sABI

The sABI was slightly higher in the female group than in the male group, but the prevalence of abnormal sABI was similar between two gender groups. A negative correlation was found between sIAND and sABI ( $R = -0.395$ ,  $p < 0.001$ ) (Table 5). In this population, the prevalence of sIAND detected by  $\geq 16$  mmHg

was 5.8% (165 cases), while, the prevalence of abnormal ABI ( $< 0.9$ ) was 2.8%. Only 37 of the 165 cases were included in the 79 cases with abnormal ABI. The overlapping subjects was 46 for the 526 sIAND cases detected by  $\geq 10$  mmHg and 31 for the 89 sIAND cases by  $\geq 20$  mmHg (Figure 1).

### Discussion

Traditionally, leg BP indicates the popliteal artery BP. Normally, the popliteal artery SBP is 20–40 mmHg higher than the brachial artery SBP. As ankle BP can be easily taken using electronic sphygmomanometer, it is used more often in clinical practice. Ankle BP is correlated with arm BP and the augmentation of central BP [15]. Elevated ankle BP was demonstrated as a risk for left ventricular hypertrophy and arterial stiffness, as well as a predictor for future dementia and cardio-cerebrovascular morbidity and mortality [9]–[11].

Intermittent claudication is a common disease caused by leg artery stenosis or occlusion. At present, palpation of dorsal artery of foot is often used to diagnose this disease. Because palpation method is insensitive, the diagnosis of intermittent claudication may be missed, especially in the early stage. On the basis of the value of systolic IAD for diagnosing subclavian or brachial artery stenosis [4],[5],[13],[16], sIAND may be considered as a useful for leg artery stenosis. In 210 hemodialysis patients, the sIAND of  $\geq 15$  mmHg was demonstrated a sign for peripheral vascular disease (11). Meanwhile, elevated sIAND has been demonstrated a predictor for increased total mortality and cardiovascular mortality [11], [12]. Unfortunately, no unified diagnosis criterion was reported and accepted now [12],[17].

This phenomenon will limit the use of sIAND in clinical practice. Combining our results and the previous data, we may suggest  $\geq 16.0$  mmHg as a cut-off value for sIAND in adults aged 40 years and over. The present study demonstrated that age, waist circumference and blood glucose levels were positively BP-independent factors for increased sIAND, because they were positively correlated not only with DeltaSBP, but with DeltaSBP/SBP. Although hypertension history was positively associated with DeltaSBP, but not with DeltaSBP/SBP, it may be a SBP-dependent factor for sIAND. Meanwhile, the present study indicated that sIAND is independent of gender as both genders had similar DETASBPs and gender was not correlated with DeltaSBP and DeltaSBP/SBP. Even the prevalence of 10 sIAND was higher in males (17.9% vs 14.2%), this gender difference for the prevalence of 10 sIAND may come from other factors existing

**Table 4.** The results of multifactor regression analysis.

| y                | x             | Unstandardized Coefficients |            | Standardized Coefficients | t      | p     | 95% Confidence Interval for B |             |
|------------------|---------------|-----------------------------|------------|---------------------------|--------|-------|-------------------------------|-------------|
|                  |               | B                           | Std. Error | Beta                      |        |       | Lower Bound                   | Upper Bound |
| $\Delta$ SBP     | (Constant)    | -3.013                      | 1.331      | -                         | -2.265 | 0.024 | -5.622                        | -0.404      |
|                  | waist         | 0.055                       | 0.013      | 0.079                     | 4.130  | 0.000 | 0.029                         | 0.081       |
|                  | Age           | 0.047                       | 0.013      | 0.071                     | 3.713  | 0.000 | 0.022                         | 0.072       |
|                  | Glucose       | 0.266                       | 0.076      | 0.066                     | 3.490  | 0.000 | 0.117                         | 0.416       |
|                  | History of HH | 0.549                       | 0.256      | 0.042                     | 2.144  | 0.032 | 0.047                         | 1.051       |
| $\Delta$ SBP/SBP | (Constant)    | -0.193                      | 0.754      | -                         | -0.256 | 0.798 | -1.672                        | 1.285       |
|                  | waist         | 0.024                       | 0.008      | 0.059                     | 3.081  | 0.002 | 0.009                         | 0.038       |
|                  | Glucose       | 0.129                       | 0.044      | 0.055                     | 2.915  | 0.004 | 0.042                         | 0.217       |
|                  | Age           | 0.021                       | 0.007      | 0.054                     | 2.857  | 0.004 | 0.006                         | 0.035       |

doi:10.1371/journal.pone.0070777.t004

**Table 5.** Comparison of sABI between two gender groups.

| Gender (n)   | sABI (mean±SD) | sABI<0.9 (%) |
|--------------|----------------|--------------|
| M(854)       | 1.12±0.09      | 58(2.9)      |
| F (1995)     | 1.10±0.09a     | 21(2.5)      |
| Total (2849) | 1.11±0.09      | 79(2.8)      |

<sup>a</sup>Compared with males,  $p<0.05$ .

doi:10.1371/journal.pone.0070777.t005

in male group, such as higher mean age and smoking rate. Because aging, obesity and abnormal glucose metabolism are important risk factors of atherosclerosis, we consider that underlying mechanism of the increased DeltaSBP is leg artery atherosclerosis in middle-aged and elderly people.

The present study showed a negative relationship between sIAND and sABI. The reason for this relationship is clear, as increased sIAND and decreased sABI are related with leg artery stenosis. However, the clinical value of sIAND could not be replaced by sABI as they are dependent on the pathological condition of different limbs. If a patient has stenosis in both arms and in a leg, his or her sABI (as well as systolic interarm BP difference) may be “pseudomorphic normal”. In this case, only sIAND can provide valuable information. Meanwhile, IAD and ABI could not be correctly evaluated in some patients, for example, the renal inadequacy patients with an artificial arteriovenous fistula in one arm. Furthermore, this study showed that the overlapping rate between sIAND and sABI was not so high, only 37 of 165 cases with sIAND by  $\geq 16$  mmHg were included into the 79 cases with abnormal sABI. Even in the 89 cases with 20 sIAND, only 31 cases with abnormal sABI. These results mean that sIAND or sABI has itself application area.

In addition, the prevalence of sABI was 2.8% on the higher SBP of two arms and the lower SBP of the two ankles. The prevalence of sABI was more lower, only 1.8% on the SBP from right side limbs and 1.4% from the left side limbs. Using the SBPs of four limbs to identify sABI may be more reasonable for better screening intermittent claudication.

## References

- Mancia G, De Backer G, Dominiczak A, Cifkova R, Fagard R, et al (2007) 2007 Guidelines for the Management of Arterial Hypertension: The Task Force for the Management of Arterial Hypertension of the European Society of Hypertension (ESH) and of the European Society of Cardiology (ESC). *Hypertens* 25:1105–1187.
- Pickering TG, Hall JE, Appel LJ, Falkner BE, Graves J, et al (2005) Recommendations for blood pressure measurement in humans and experimental animals: Part 1: blood pressure measurement in humans: a statement for professionals from the Subcommittee of Professional and Public Education of the American Heart Association Council on High Blood Pressure Research. *Hypertension* 45:142–161.
- Daskalopoulou SS, Khan NA, Quinn RR, Ruzicka M, McKay DW, et al (2012) The 2012 Canadian hypertension education program recommendations for the management of hypertension: blood pressure measurement, diagnosis, assessment of risk, and therapy. *Can J Cardiol* 28:270–87.
- Clark CE, Taylor RS, Shore AC, Campbell JL (2012) The difference in blood pressure readings between arms and survival: primary care cohort study. *BMJ* 20;344:e1327. doi: 10.1136/bmj.e1327.
- Clark CE, Campbell JL, Powell RJ, Thompson JF (2007) The inter-arm blood pressure difference and peripheral vascular disease: cross-sectional study. *Fam Pract* 24:420–426.
- Su HM, Lin TH, Hsu PC, Chu CY, Lee WH, et al (2012) Association of interarm systolic blood pressure difference with atherosclerosis and left ventricular hypertrophy. *PLoS One* 7:e41173. doi: 10.1371/journal.pone.0041173.
- Igarashi Y, Chikamori T, Tomiyama H, Usui Y, Hida S, et al (2007) Clinical significance of inter-arm pressure difference and ankle-brachial pressure index in patients with suspected coronary artery disease. *J Cardiol* 50 :281–289.
- Gallego P, Roldán V, Marín F, Jover E, Manzano-Fernández S, et al (2012) Ankle brachial index as an independent predictor of mortality in anticoagulated atrial fibrillation. *Eur J Clin Invest* 42:1302–1308.
- Gemignani T, Matos-Souza JR, Franchini KG, Nadruz W Jr (2012) Leg blood pressure measured in orthostatic posture is associated with left ventricular mass in normotensive subjects. *Am J Hypertens* 25:1083–1087.
- Hietanen H, Pääkkönen R, Salomaa V (2010) Ankle and exercise blood pressures as predictors of coronary morbidity and mortality in a prospective follow-up study. *J Hum Hypertens* 24:577–84.
- Hietanen HJ, Pääkkönen R, Salomaa V (2011) Predictors of cerebrovascular morbidity and mortality in a prospective follow-up study. *Stroke Res Treat Jan* 17;2010:729391. doi: 10.4061/2010/729391.
- Chen SC, Chang JM, Tsai YC, Tsai JC, Su HM, et al (2012) Association of interleg BP difference with overall and cardiovascular mortality in hemodialysis. *Clin J Am Soc Nephrol* 7:1646–53.
- Sheng CS, Liu M, Zeng WF, Huang QF, Li Y, et al. (2013) Four-limb blood pressure as predictors of mortality in elderly Chinese. *Hypertension Apr* 8. [Epub ahead of print]
- Clark CE, Powell RJ (2002) The differential blood pressure sign in general practice: prevalence and prognostic value. *Family Practice* 2002;19(5):439–441.

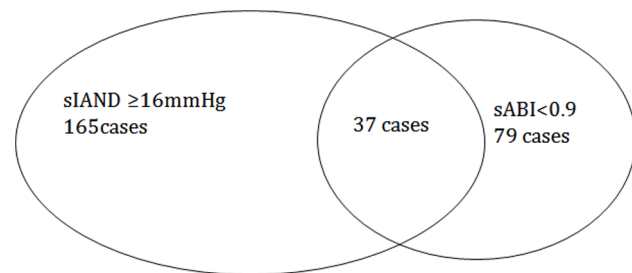

**Figure 1.** The relationship between increased sIAND and abnormal sABI.

doi:10.1371/journal.pone.0070777.g001

## Clinical implication

Palpation of the leg artery is usually used to diagnose intermittent claudication in clinical treatment, but this method is insensitive. For correct diagnosis, artery imaging from computer tomography or catheterization is needed. Compared with the above-mentioned expensive or invasive examinations, evaluating sIAND is simpler and cheaper. So sIAND may be a useful index for screening asymptomatic intermittent claudication.

## Limitation

Although we suggest DETA BBP  $\geq 16$  mmHg as a reference of cut-off value for sIAND in adults aged 40 years and over, its clinical value should be demonstrated by artery imaging evidence in the future.

## Conclusion

In a community population, 18.5% of subjects showed DETASBP of  $\geq 10$  mmHg, but only 5.8% had DETA SBP of  $\geq 16$  mmHg, a normal upper limit suggested by this study. Aging, obesity and abnormal glucose metabolism are SBP-independent positive factors for increased sIAND.

## Author Contributions

Conceived and designed the experiments: HS. Performed the experiments: ZHZ. Analyzed the data: JYM XHT YYZ ZHZ. Contributed reagents/materials/analysis tools: HS XL.

15. Tarumi T, Sugawara J, Tanaka H (2011) Association between ankle blood pressure and central arterial wave reflection. *J Hum Hypertens* 25:539–44.
16. Verberk WJ, Kessels AG, Thien T (2011) Blood pressure measurement method and inter-arm differences: a meta-analysis. *Am J Hypertens* 24:1201–1208.
17. Su YJ, Lai YC, Chen CC, Tang LM, Chang WH, et al (2007) Inter-arm and inter-leg systolic blood pressure differences in aortic dissection. *International Journal of Gerontology* 1: 153–156
